# Supplementary material
Source: PubMed Central journal article supplement (PMC2869255)

## SUPPLEMENTAL MATERIALS

**“Glucose intolerance and impaired insulin secretion in pancreas-specific STAT3 KO mice are associated with microvascular alterations in the pancreas” by Kostromina *et al.***

### MATERIALS AND METHODS

**Evaluation of vascular density by immunostaining.** Five  $\mu\text{m}$  cryosections from different parts of the pancreas were immunostained with FITC-conjugated Isolectin-B4 from *Bandeiraea simplicifolia* (BSI-B4, L2895, Sigma) diluted in TBS at 10  $\mu\text{g}/\text{ml}$  or antibody against VE-Cadherin (#555289, BD Pharmingen) at 1:200 dilution. After immunostaining, confocal images of 10 serial sections from each animal were acquired using a Zeiss LSM510 META confocal microscope (objectives 40x, 63x; Carl Zeiss, Germany). All images were acquired with identical settings on the laser scanning system. Vascular density was assessed as area of positive Isolectin-B4 or VE-Cadherin signal above a preset threshold value relative to the whole pancreatic area using Image Pro-Plus software.

### FIGURE LEGENDS

#### **Figure 1. Reduced islet microvascular density in female STAT3 KO mice**

**A.** Five  $\mu\text{m}$  cryosections of p-KO and control mouse pancreas were immuno-labeled with STAT3 (red) and endothelial marker Isolectin-B4 (green). **B.** Vascular density, measured as Isolectin B4-stained area relative to the islet area was reduced in p-KO (grey bar, N = 4 mice) compared with control mice (white bar, N = 4 mice). Images taken from 10 pancreatic sections of each animal were used for analysis. Data are presented as means  $\pm$  SEM. \*\*,  $p < 0.01$ .

#### **Figure 2. Reduced islet microvascular density in female STAT3 KO mice**

**A.** Five  $\mu\text{m}$  cryosections of p-KO and control mouse pancreas were immuno-labeled with STAT3 (red) and endothelial marker VE-Cadherin (green). **B.** Vascular density, measured as VE-Cadherin-stained area relative to the whole pancreas was reduced in p-KO (grey bar, N =

4 mice) compared with control mice (white bar, N = 4 mice). Images taken from 10 pancreatic sections of each animal were used for analysis. **C.** Vascular density in the islets (e.g. inside yellow boundary in **A**) and exocrine pancreas (e.g. outside yellow boundary in **A**) was similarly assessed as in **B**. Vascular density was significantly reduced in the islets and exocrine pancreas. Data are presented as means  $\pm$  SEM. Images taken from 10 pancreatic sections of each mouse, 4 mice per group were used for analysis. \*,  $p < 0.05$ ; \*\*,  $p < 0.01$ .

**Figure 3. Reduced islet microvascular density in male STAT3 KO mice**

**A.** Five  $\mu\text{m}$  cryosections of p-KO and control mouse pancreas were immuno-labeled with STAT3 (red) and endothelial marker CD31 (green). **B.** Vascular density, measured as CD31-stained area relative to the whole pancreas was reduced in p-KO (grey bar, N = 4 mice) compared with control mice (white bar, N = 4 mice). Images taken from 10 pancreatic sections of each animal were used for analysis. **C.** Vascular density in the islets (e.g. inside yellow boundary in **A**) and exocrine pancreas (e.g. outside yellow boundary in **A**) was similarly assessed as in **B**. Vascular density was significantly reduced in the islets (\*\*,  $p < 0.01$ ), and marginally reduced in the exocrine tissue (#,  $p = 0.08$ ). Data are presented as means  $\pm$  SEM. Images taken from 10 pancreatic sections of each mouse, 4 mice per group were used for analysis.

**A**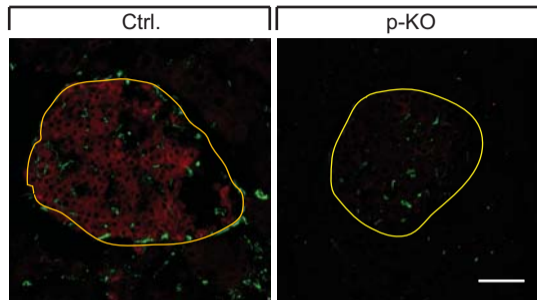**B**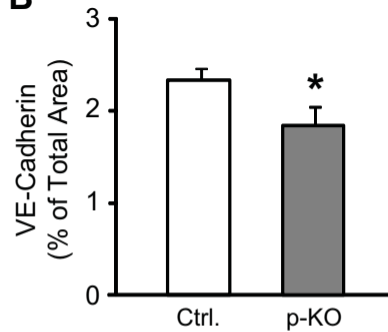**C**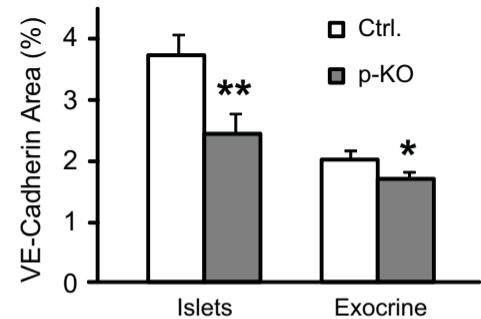

**A**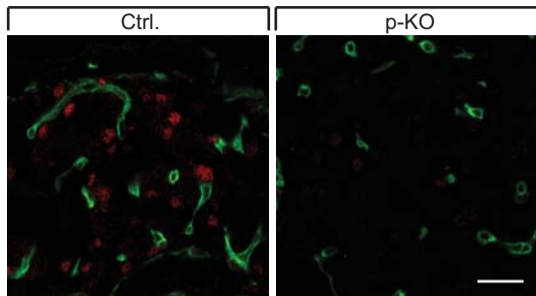**B**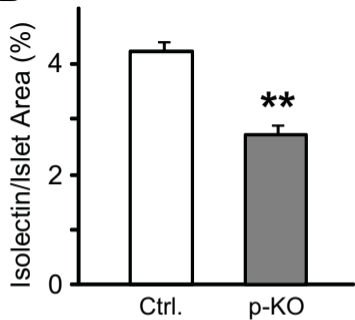

**A**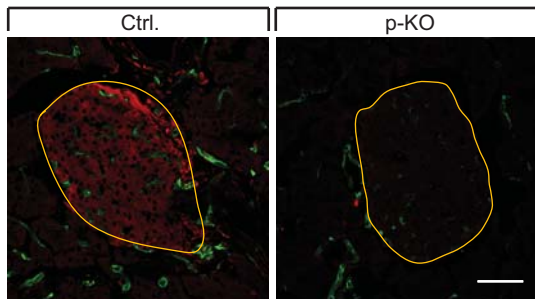**B**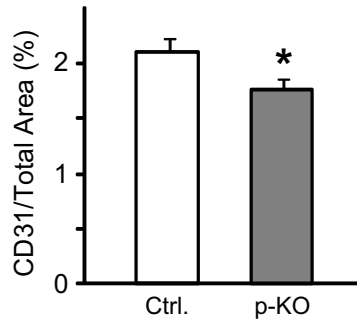**C**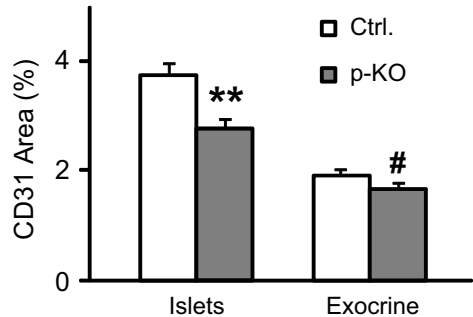

Supplement: en.2009-1199_1.pdf [file en.2009-1199_1.pdf]
